# Supplementary material for: Identification and clinical validation of a multigene assay that interrogates the biology of cancer stem cells and predicts metastasis in breast cancer: A retrospective consecutive study
Source: PubMed Central journal article supplement — eBioMedicine. 2019 Mar 5;42:352–62. doi: 10.1016/j.ebiom.2019.02.036 (PMC6491379; doi:10.1016/j.ebiom.2019.02.036), 2019-03-05
Supplement: mmc3.pdf [file mmc3.pdf]

## SUPPLEMENTARY MATERIAL

### Supplementary Methods

#### Study population

The retrospective consecutive cohort of 2,453 female BC patients was obtained from a systematic retrieval of information from a dedicated database containing all consecutive BC patients operated at the European Institute of Oncology (IEO) in Milan between 1997 and 2000, which led to the selection of 3,396 patients based on the following inclusion criteria: i) operable BC, ii) female, iii) BC as first primary tumour, with no history of a previous malignancy, iv) no distant metastasis at diagnosis and v) no neoadjuvant therapy (Supplementary Table S3).

Available clinicopathological information included age, date at surgery, tumour characteristics (histological type, tumour size, nodal involvement, grade, perivascular infiltration, Ki-67 and ER/PgR expression) and treatment modality (type of surgery, adjuvant radiotherapy, hormonal therapy, chemotherapy) (Supplementary Table S3). In this cohort, ER, PgR and Ki-67 were measured by immunohistochemistry (IHC) on whole tissue sections, and were retrieved from histopathological reports. Conversely, IHC analysis of HER2 expression was repeated *ad hoc* for the purpose of this study.

Paraffin blocks were available for 2,935 patients, due to the exclusion of four hundred sixty one blocks showing biological degradation of the paraffin-embedded tissue material. After review of haematoxylin and eosin-stained slides, four hundred eighty-two tissue blocks were excluded for insufficient tumour cellularity (<60% cellularity), minimal areas of infiltrating carcinoma with respect to *in situ* carcinoma areas, and/or presence of massive inflammatory infiltration or massive necrosis, resulting in the final selection of 2,453 patients who represent the “IEO BC 97-00” study cohort (described in Supplementary Table S3).

The comparison of the demographics and clinicopathological characteristics between the initial selection of 3,396 patients and the final “IEO BC 97-00” study cohort showed that the two populations were similar, with no substantial differences in any of the variables analysed (Supplementary Table S3).

From the study cohort of 2,453 patients, successful extraction of a sufficient amount of RNA suitable to multiplex RT-qPCR analysis was possible for 2,335 patients. After quality control of RT-qPCR data, a total of 19 samples (19/2,335=0.8%) were excluded from statistical analyses because of spurious RT-qPCR results, likely due to poor quality mRNA. Therefore, a total of 2,316 patients were finally included in the statistical analyses.

Patient follow-up included physical examination, annual mammography and breast ultrasound every 6 months, blood tests every 6-12 months, and further evaluations only in the case of symptoms. When possible, the status of women who had not attended their scheduled follow-up visits for more than one year was obtained by telephone contact.

The different molecular subtypes of BC (i.e., Luminal, HER2+ and Triple-Negative) were defined according to the St. Gallen 2015 classification, and identified through the immunohistochemical surrogate panel including ER/PgR, HER2 and Ki-67.<sup>8,19</sup>

#### Quantitative real-time PCR analysis

Total mRNA was extracted from FFPE samples using a single core of 1.5 mm in diameter (2,157 samples), or at least two 10-µm thick sections (178 samples) when tumour size was limited. Tissue cores and/or sections were selected by a pathologist. Total RNA was extracted using the AllPrep DNA/RNA FFPE Kit automated on the QIAcube (Qiagen), following manufacturer’s instructions.

RT-qPCR was performed with an in-house custom designed TaqMan® Array using hydrolysis probes (ThermoFisher Scientific) in combination with the SsoAdvanced Universal Probes Supermix (Bio-Rad Laboratories) in a final volume of 10 µl in 384-well plates. PCR reactions were run in LightCycler (LC) 480 real-time PCR instruments (Roche) using the following thermal cycling conditions: 1 cycle at 95°C for 30 sec, 45 cycles at 95°C for 5 sec and 60°C for 30 sec. TaqMan gene expression assays were selected based on amplicon size (<100 bp), and on their ability to detect the Ref Seq identified in the Affymetrix meta-analysis and as many isoforms as possible. Custom TaqMan assays were designed, when possible, in the 3’ region of the gene using the Primer Express Software V3.0 (ThermoFisher Scientific) (see Supplementary Table S4 for a detailed list). Standard methods for RT-qPCR data mining and manufacturer’s recommendations for quality control and sample rejection were used in the analysis of RT-qPCR data. Each target was assayed in triplicate and average Cq (AVG Cq) values were calculated from triplicate values, when the standard deviation was <0.4, or from the best duplicate values when the standard deviation was ≥0.4. AVG Cq values were calculated and normalized using four reference genes (*HPRT1*, *GAPDH*, *GUSB* and *TBP*). The normalized Cq (Cq<sub>normalized</sub>) of each target gene was calculated using the following formula: Cq<sub>normalized</sub> = AVG Cq - SF, where: SF is the difference between the AVG Cq value of reference genes for each patient and a constant reference value K, which represents the mean of the AVG Cq of the 4 reference genes calculated across all samples (K = 25.012586069). This

normalization strategy allows the retention of information about the abundance of the original transcript, as measured by RT-qPCR (i.e., in Cq scale), which is conversely lost when using the more classical  $\Delta Cq$  method. A Cq=35 was considered as our limit of detection and Cq values beyond this limit were set to 35 and normalization was omitted.

### **Rationale for the use of the tumoursphere serial propagation assay as a tool to investigate the biological basis of the 20-gene SC signature**

The tumoursphere propagation assay was performed as previously described,<sup>6,7</sup> starting from patient-derived primary tumour cells freshly isolated from biopsy tumour specimens (the prospective cohort of 90 patients, described in Supplementary Table 9).

This assay is based on the ability of CSCs to survive in suspension culture conditions, giving origin to three-dimensional spheroid structures that can be serially dissociated and propagated through several passages. In previous work, we established that the efficiency of patient-derived primary tumour cells to sustain the formation of several generations of tumourspheres *in vitro* depends on their intrinsic propensity to self-renew and proliferate, and provides a quantitative estimate of the number of CSCs in individual BCs.<sup>6,7</sup> Indeed, upon tumoursphere dissociation and serial propagation, the cumulative number of tumourspheres over several passages can either exponentially increase (what we call an “unlimited” phenotype) or progressively extinguish (“self-limiting” phenotype”) (examples of actual tumours showing these two opposite biological behaviours are in Fig. 3c of the main text). Of note, these *in vitro*-determined phenotypes stringently correlate with the biological aggressiveness of the tumour *in vivo*, as formally demonstrated in limiting-dilution transplantation experiments in our previous studies.<sup>6,7</sup> Mechanistically, we demonstrated that different modalities of the CSC self-renewing division are responsible for the two phenotypes: CSCs that preferentially divide symmetrically (1 CSC  $\rightarrow$  2CSCs) give rise to an unlimited self-renewal phenotype, while CSCs that preferentially divide asymmetrically (1 CSC  $\rightarrow$  1 CSC + 1 non-tumourigenic progenitor) produce a self-limiting phenotype.<sup>6</sup>

## SUPPLEMENTARY FIGURES

### Supplementary Figure S1

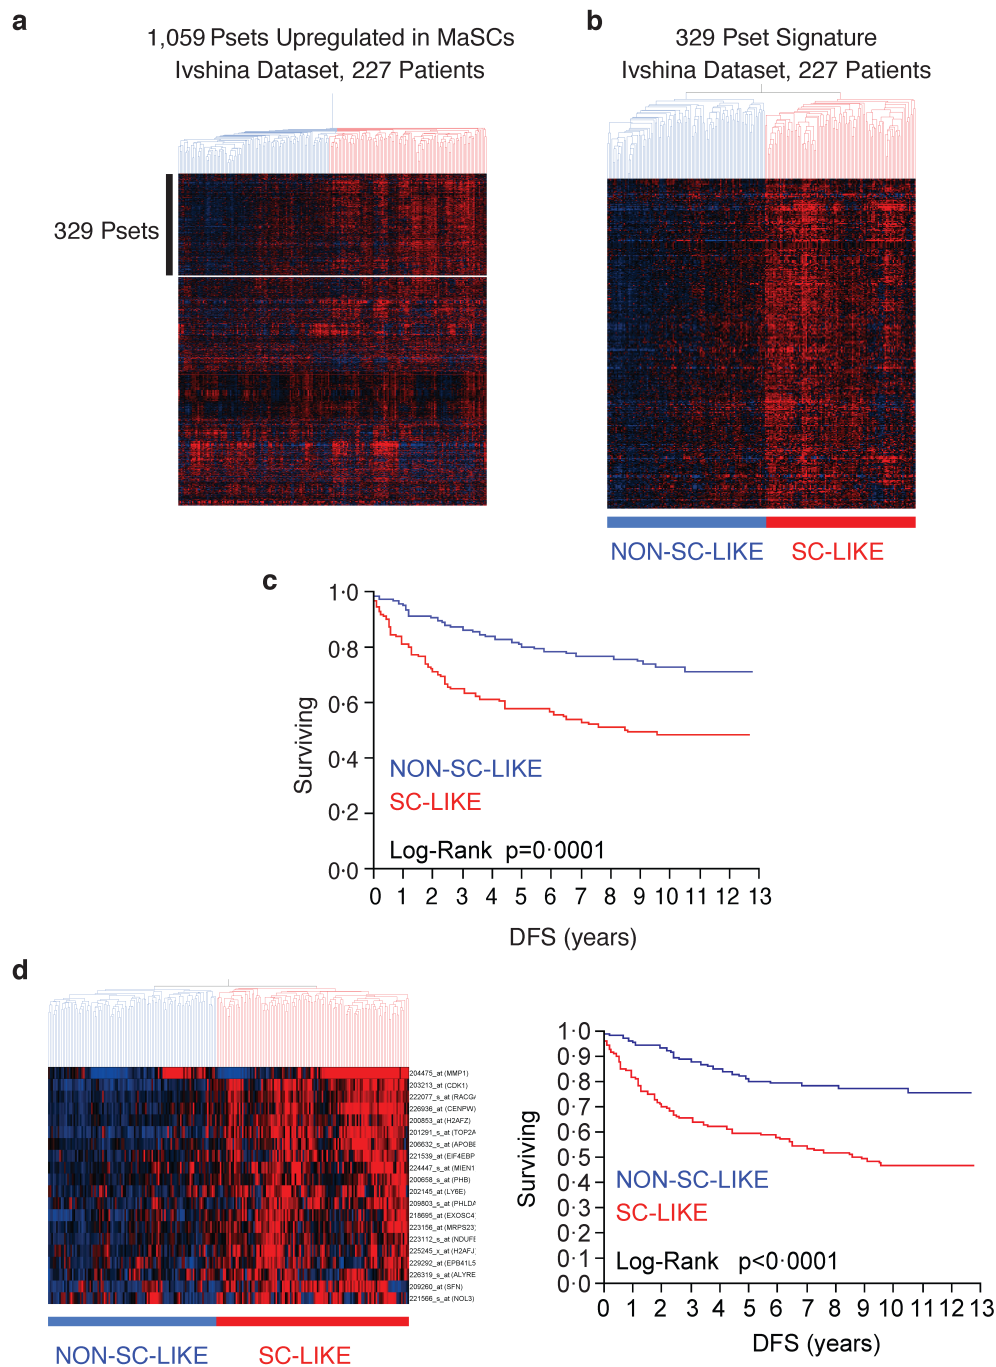

#### Legend to Supplementary Figure S1. Derivation and initial analytical validation of the 20-gene SC signature.

**a.** Distribution of 227 BC patients from the Ivshina *et al.* dataset<sup>9</sup> by unsupervised hierarchical clustering analysis using the 1,059 probesets upregulated in MaSCs *vs.* progenitors, identified in previous studies.<sup>7</sup> Two groups of BC patients could be identified based on their similarity to the expression pattern of 329 probesets (indicated by the bar on the left of the cluster). **b.** Unsupervised hierarchical clustering analysis of the 227 BC patients from the Ivshina *et al.* dataset<sup>9</sup> using the 329-signature, which allowed the identification of two subgroups of patients with distinct “SC-like” and “Non-SC-like” characteristics. **c.** Kaplan-Meier analysis of disease-free survival (DFS) in the “SC-like” and “Non-SC-like” subgroups of BC patients from the Ivshina *et al.* dataset,<sup>9</sup> according to the 329-signature. **d.** The 20 most highly expressed probesets of the 329-signature (see Supplementary Table S1) were used for the hierarchical clustering analysis (left panel) and the Kaplan-Meier analysis of DFS (right panel) of the “SC-like” and “Non-SC”-like BC patients from the Ivshina *et al.* dataset.<sup>9</sup>

## Supplementary Figure S2

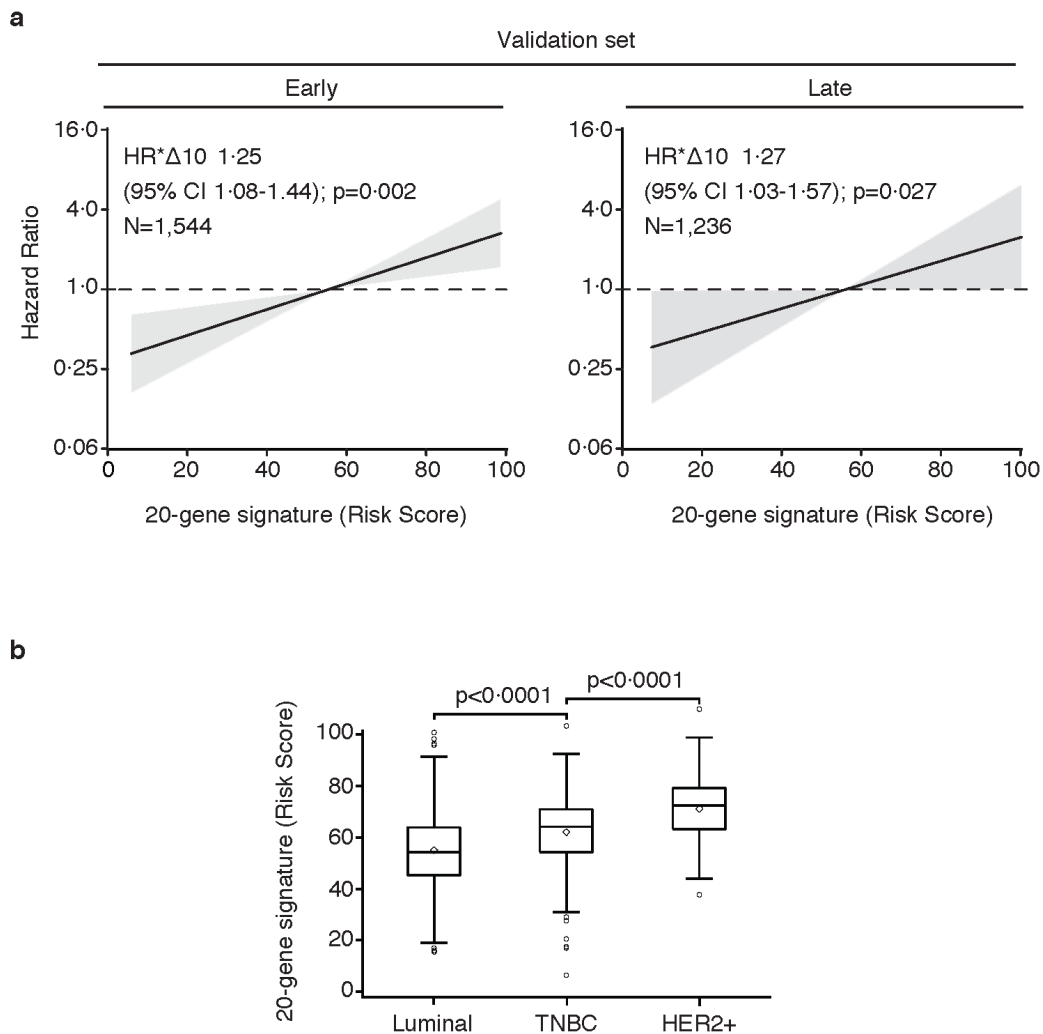

### Legend to Supplementary Figure S2. Analysis of the clinical validity of the 20-gene SC signature in the IEO BC 97-00 study cohort.

**a.** The 20-signature risk score is an independent predictor of early (0-5 years) and late (5-10 years) distant metastasis in the “IEO BC 00-97” validation set (N=1,544). Shown are multivariable hazard ratios estimated using the risk score as a continuous variable with a 10-unit increase ( $HR^*\Delta 10$ ) in a multivariable model adjusted for Grade (G1, G2 and G3), Ki-67 (Ki-67<14% and Ki-67≥14%), HER2 status (positive and negative), ER/PgR status [not expressed (Both 0) and expressed (ER>0 or PgR>0)], tumour size (pT1 and pT2-3-4), number of positive lymph nodes (pN0, pN1-2-3 and pNX) and age at surgery (<50 and ≥50). Grey shaded areas represent the 95% CI. Vertical axis (HR) is plotted in logarithmic scale. HR, hazard ratio; CI, confidence interval; p, p-value.

**b.** Box plots showing the distribution of the 20-gene SC continuous risk score across the indicated BC molecular subtypes in the “IEO BC 97-00” validation set. TNBC, Triple-Negative BC; HER2+, HER2-positive BC. Differences in the distribution of continuous risk score between groups were evaluated using a linear regression model.

## Supplementary Figure S3

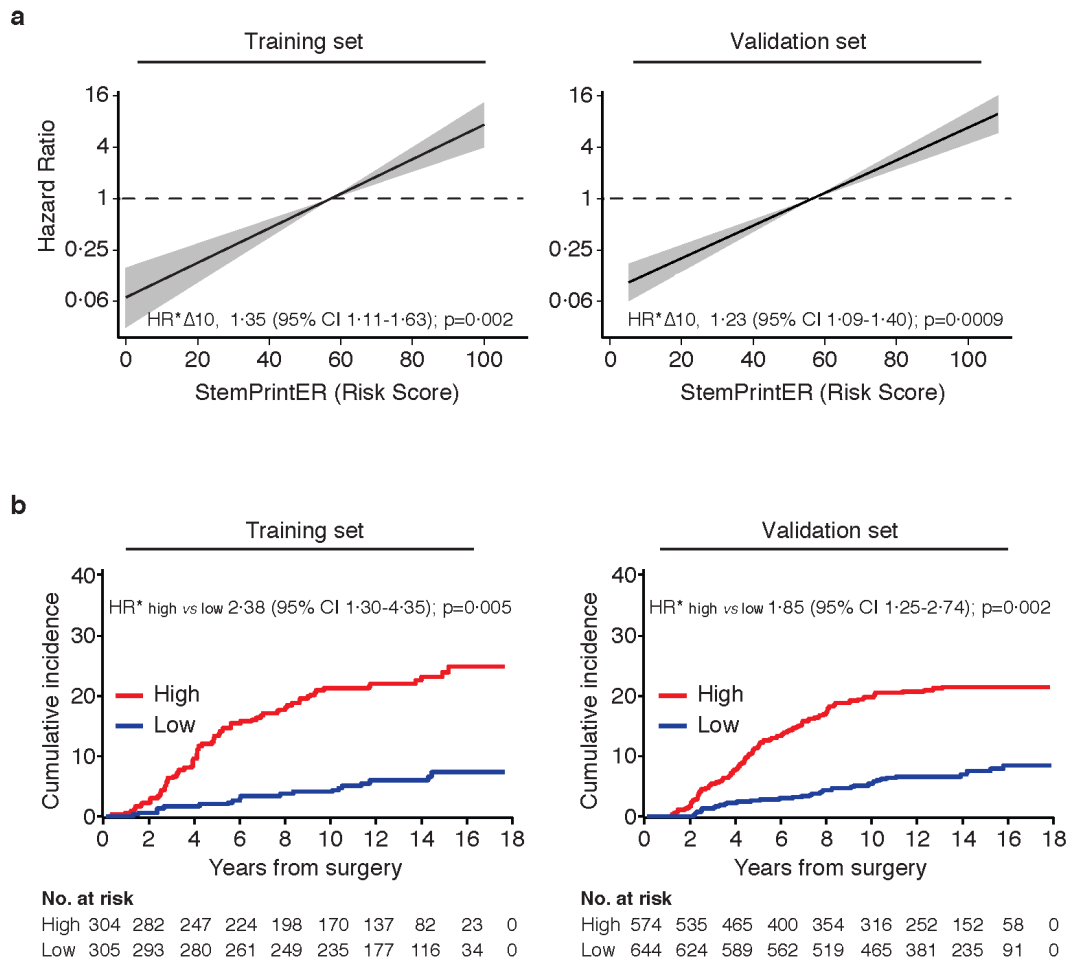

### Legend to Supplementary Figure S3. Prognostic value of StemPrintER in the ER+/HER2- training and validation sets.

**a.** The StemPrintER risk score, used as a continuous function (10-unit increase,  $\Delta 10$ ) over the entire follow-up interval, provides prognostic information beyond that obtained from traditional clinicopathological parameters. Shown are multivariable hazard ratios (HR\*) estimated with a multivariable model adjusted for Grade (G1, G2 and G3), Ki-67 (Ki-67<14% and Ki-67 $\geq$ 14%), HER2 status (positive and negative), ER/PgR status [not expressed (Both 0) and expressed (ER>0 or PgR>0)], tumour size (pT1 and pT2-3-4), number of positive lymph nodes (pN0, pN1-2-3 and pNX) and age at surgery (<50 and  $\geq$ 50). Grey shaded areas represent the 95% CI. Vertical axis is plotted in logarithmic scale. HR, hazard ratio; CI, confidence interval; p, p-value.

**b.** Cumulative incidence of distant metastasis determined using StemPrintER as a 2-class risk model (High, Low) in the training and validation sets over the entire follow-up interval. Multivariable hazard ratios (High vs. Low) were estimated as in (a). HR\*, multivariable hazard ratio; CI, confidence interval; p, p-value; “No. at risk”, number of patients at risk.

## SUPPLEMENTARY TABLES

**Supplementary Table S1 (available as excels file). Derivation of a BC prognostic 20-signature based on the human MaSC profile using the Ivshina BC Dataset.**

**Sheet “Ivshina Dataset”.** Clinicopathological and molecular characteristics of the BC patient cohort from the Ivshina *et al.* dataset.<sup>9</sup> For each patient, the “SC-like” status for both the 20-signature (column D) and the 329-signature (column E) is also indicated.

**Sheet “329 pset Ivshina”.** List of the probesets upregulated in human normal MaSCs *vs.* progenitors,<sup>7</sup> which identify a subgroup of a SC-like BC patients in the unsupervised hierarchical clustering of the Ivshina *et al.* dataset<sup>9</sup> (see Supplementary Fig. 1a). The genes highlighted in yellow constitute the 20-gene signature.

For each entry, the following information is reported (from left to right) for this and subsequent sheets:

- Affy probeset (corresponding to the detecting probeset on Affymetrix HG-U133\_Plus\_2 GeneChips).
- Gene name (HUGO nomenclature when available).
- Average FC (fold-change) in “SC-like” *vs.* “Non-SC-like” BC comparison, across all patients.
- Statistical analysis of the difference in expression of each gene comparing “SC-like” *vs.* “Non-SC-like” BC groups, using the Benjamini correction (False Discovery Rate, FDR) to estimate the corrected p value.
- Description, Gene Name.

**Sheet “20 pset Ivshina”.** List of the 20 probesets, with the highest differential expression, from the 329-signature used to perform a new hierarchical clustering analysis of the BC patient cohort of the Ivshina *et al.* dataset<sup>9</sup> (see Supplementary Fig. 1b).

**Sheet “Ivshina HR”.** Univariate and multivariable analyses of the prognostic power of the 329-gene signature and 20-gene signature in the Ivshina *et al.* dataset.<sup>9</sup> Clinical endpoint: disease-free survival (DFS) (Supplementary Fig. 1, c and d).

**Supplementary Table S2 (available as excels file). Analytical validation of the prognostic power of the 20-signature in independent genome-wide BC expression datasets.**

**Sheet “Pawitan Dataset”.** Clinicopathological and molecular characteristics of the BC patient cohort from the Pawitan *et al.* dataset.<sup>10</sup> For each patient, the “SC-like” status according to the 20-signature (column B) is also indicated.

**Sheet “20 pset Pawitan”.** The 20 probesets, as above, were used to perform the unsupervised hierarchical clustering analysis of the BC patient cohort of the Pawitan *et al.* dataset,<sup>10</sup> shown in Fig. 2 (top, left panel).

**Sheet “Pawitan HR”.** Univariate and multivariable analyses of the prognostic power of the 20-signature in the Pawitan *et al.* dataset.<sup>10</sup> Clinical endpoint: disease-free survival (DFS) (Fig. 2; top, right panel).

**Sheet “Loi KI Dataset”.** Clinicopathological and molecular characteristics of the BC cohort from the Loi *et al.* dataset.<sup>11</sup> For each patient, the “SC-like” status according to the 20-signature (column D) is also indicated.

**Sheet “20 pset Loi KI”.** The 20 probesets, as above, were used to perform the unsupervised clustering of the BC patient cohort of the Loi *et al.* dataset,<sup>11</sup> shown in Fig. 2 (middle, left panel).

**Sheet “Loi KI HR”.** Univariate and multivariable analyses of the prognostic power of the 20-signature in the Loi *et al.* dataset.<sup>11</sup> Clinical endpoints: disease-free survival, (DFS); distant metastasis (DM) (Fig. 2; middle, right panel).

**Sheet “Metabric Dataset”.** Clinicopathological and molecular characteristics of the BC cohort from the METABRIC dataset.<sup>12</sup> For each patient, the “SC-like” status according to the 20-signature (column B) is also indicated.

**Sheet “Metabric HR”.** Univariate and multivariable analyses of the prognostic power of the 20-signature in the METABRIC cohort.<sup>12</sup> Clinical endpoints: death from breast cancer (Fig. 2; bottom, right panel).

**Supplementary Table S3.** Comparison of the clinicopathological variables between the initial consecutive cohort of BC patients from years 1997-2000 and the final “IEO BC 97-00” study cohort.

| Variable               | Stratum                   | Original patient selection from years 1997-2000 (N=3,396)<br>N (%) | Study cohort (“IEO BC 97-00”) (N=2,453)<br>N (%) |
|------------------------|---------------------------|--------------------------------------------------------------------|--------------------------------------------------|
| <b>Year of Surgery</b> | 1997                      | 609 (17.9)                                                         | 484 (19.7)                                       |
|                        | 1998                      | 825 (24.3)                                                         | 603 (24.6)                                       |
|                        | 1999                      | 961 (28.3)                                                         | 684 (27.9)                                       |
|                        | 2000                      | 1001 (29.5)                                                        | 682 (27.8)                                       |
| <b>Age at surgery</b>  | <35                       | 150 (4.4)                                                          | 90 (3.7)                                         |
|                        | 35-50                     | 1331 (39.2)                                                        | 957 (39.0)                                       |
|                        | 51-65                     | 1389 (40.9)                                                        | 1001 (40.8)                                      |
|                        | >65                       | 526 (15.5)                                                         | 405 (16.5)                                       |
| <b>Histology</b>       | Ductal                    | 2618 (77.1)                                                        | 1960 (79.9)                                      |
|                        | Lobular                   | 353 (10.4)                                                         | 195 (7.9)                                        |
|                        | Mixed                     | 88 (2.6)                                                           | 69 (2.8)                                         |
|                        | Other                     | 337 (9.9)                                                          | 229 (9.3)                                        |
| <b>pT</b>              | pT1                       | 2234 (65.8)                                                        | 1616 (65.9)                                      |
|                        | pT2                       | 1046 (30.8)                                                        | 756 (30.8)                                       |
|                        | pT3/ pT4                  | 116 (3.4)                                                          | 81 (3.3)                                         |
| <b>pN</b>              | pNX                       | 98 (2.9)                                                           | 59 (2.4)                                         |
|                        | pN0                       | 1748 (51.5)                                                        | 1207 (49.2)                                      |
|                        | pN1                       | 997 (29.4)                                                         | 764 (31.1)                                       |
|                        | pN2                       | 344 (10.1)                                                         | 266 (10.8)                                       |
|                        | pN3                       | 209 (6.2)                                                          | 157 (6.4)                                        |
| <b>Grade</b>           | n/a                       | 114 (3.4)                                                          | 57 (2.3)                                         |
|                        | 1                         | 690 (20.3)                                                         | 468 (19.1)                                       |
|                        | 2                         | 1485 (43.7)                                                        | 1069 (43.6)                                      |
|                        | 3                         | 1107 (32.6)                                                        | 859 (35.0)                                       |
| <b>LVI</b>             | Absent                    | 2424 (71.4)                                                        | 1681 (68.5)                                      |
|                        | Focal                     | 571 (16.8)                                                         | 452 (18.4)                                       |
|                        | Diffuse                   | 401 (11.8)                                                         | 320 (13.0)                                       |
| <b>ER/PgR</b>          | n/a                       | 11 (0.3)                                                           | 0 (0.0)                                          |
|                        | Not expressed (Both 0)    | 525 (15.5)                                                         | 341 (13.9)                                       |
|                        | Expressed (ER>0 or PgR>0) | 2860 (84.2)                                                        | 2112 (86.1)                                      |
| <b>HER2 Status</b>     | n/a                       | 1197 (35.2)                                                        | 254 (10.4)                                       |
|                        | NEG                       | 1935 (57.0)                                                        | 1935 (78.9)                                      |
|                        | POS                       | 264 (7.8)                                                          | 264 (10.8)                                       |
| <b>Ki-67</b>           | Unknown                   | 37 (1.1)                                                           | 2 (0.1)                                          |
|                        | <14%                      | 1096 (32.3)                                                        | 720 (29.4)                                       |
|                        | ≥14%                      | 2263 (66.6)                                                        | 1731 (70.6)                                      |
| <b>CT/HT</b>           | Nil                       | 185 (5.4)                                                          | 116 (4.7)                                        |
|                        | HT                        | 1251 (36.8)                                                        | 866 (35.3)                                       |
|                        | CT                        | 514 (15.1)                                                         | 345 (14.1)                                       |
|                        | CT- HT                    | 1446 (42.6)                                                        | 1126 (45.9)                                      |
| <b>Surgery</b>         | n/a                       | 2 (0.1)                                                            | 0 (0.0)                                          |
|                        | Quadrantectomy            | 2727 (80.3)                                                        | 1996 (81.4)                                      |
|                        | Mastectomy                | 667 (19.6)                                                         | 457 (18.6)                                       |
| <b>Radiotherapy</b>    | No                        | 654 (19.3)                                                         | 450 (18.3)                                       |
|                        | Yes                       | 2742 (80.7)                                                        | 2003 (81.7)                                      |
| <b>First Event</b>     | No event                  | 2157 (63.5)                                                        | 1513 (61.7)                                      |
|                        | Loco-Regional             | 276 (8.1)                                                          | 193 (7.9)                                        |
|                        | Distant Metastasis        | 474 (14.0)                                                         | 356 (14.5)                                       |
|                        | Other                     | 489 (14.4)                                                         | 391 (15.9)                                       |

**Legend to Supplementary Table S3.** Comparison of the clinicopathological variables between the initial consecutive cohort of 3,396 BC patients from years 1997-2000 and the final “IEO BC 97-00” cohort of 2,453 patients (study cohort). The number (N) of patients and percentage (%) in each group is indicated. The event Distant Metastasis was defined as the occurrence of distant metastasis or death from BC as a first event (see Methods). Other events include second primary cancer or death from unknown causes or other causes. pT, primary tumour size; pN, nodal status; LVI, lymphovascular invasion; ER, oestrogen receptor; PgR, progesterone receptor; Ki-67, proliferation index. CT, adjuvant chemotherapy; HT, adjuvant hormone therapy; Nil, no adjuvant therapy; n/a, not available.



**Supplementary Table S4.** Design details for each TaqMan gene expression assay used in the PCR analysis.

| Gene Symbol | Assay ID      | Ref Seq        | Exon Boundary | Assay Location | Amplicon Length | Primer and Probe sequences                                                                                                         |
|-------------|---------------|----------------|---------------|----------------|-----------------|------------------------------------------------------------------------------------------------------------------------------------|
| APOBEC3B    | custom        | NM_001270411.1 | 7             | 1095-1151      | 57              | Forward Primer:<br>GGCTGCGGGCCATTC<br>Reverse Primer:<br>CTTAGAGACTGAGGCCCATCCTT<br>Probe-FAM:<br>CCAGAATCAGGGAAAC                 |
| RACGAP1     | custom        | NM_001320007.1 | 17 - 18       | 1511-1578      | 68              | Forward Primer:<br>TGTTACAGGACATCAAGCGTCAA<br>Reverse Primer:<br>CCAATACTCCAGAGGCAAGGAA<br>Probe-FAM:<br>CCAAGGTGGTTGAGCG          |
| CENPW       | custom        | NM_001012507.3 | 2             | 664-724        | 61              | Forward Primer:<br>CAAACGCTTGTGCGAGTAAATG<br>Reverse Primer:<br>TTTGCTGCGGCCAGTACA<br>Probe-FAM:<br>AGAGTCATTAACAAGGAGC            |
| H2AFZ       | custom        | NM_002106.3    | 1             | 501-559        | 59              | Forward Primer:<br>GCTGGTGGTGGTGCATTCC<br>Reverse Primer:<br>TGTTGCCTTTCTTCCCAATCA<br>Probe-FAM:<br>CACATCCACAAATCT                |
| EXOSC4      | custom        | NM_019037.2    | 3 - 4         | 432-499        | 69              | Forward Primer:<br>GAAGCAGCCATCCTCACACA<br>Reverse Primer:<br>GCCTGTAGCACCTGCACATAGA<br>Probe-FAM:<br>ACCCACGCTCCAGAT              |
| NOL3        | custom        | NM_001276312.1 | 5             | 1428-1482      | 55              | Forward Primer:<br>GCCACCACGAGCATCA<br>Reverse Primer:<br>CCTGGACTCCTAAGGGCAGAT<br>Probe-FAM:<br>CCAGTCCTCAGCCC                    |
| PHB         | custom        | NM_001281496.1 | 8             | 1176-1237      | 62              | Forward Primer:<br>TCCACCTCCCTACCAAAAATTG<br>Reverse Primer:<br>CCCGAATTGGGACCTAAAGC<br>Probe-FAM:<br>CAAGTGCCTATGCAAAC            |
| H2AFJ       | custom        | NM_177925.3    | 1             | 2131-2190      | 60              | Forward Primer:<br>CAAAGGTCAGGCCGTACACA<br>Reverse Primer:<br>ACATCTCGAACCTGCCCAAT<br>Probe-FAM:<br>CTCTGTTAGGAGGCAAAT             |
| SFN         | custom        | NM_006142.3    | 1             | 1115-1177      | 63              | Forward Primer:<br>TGCTCTGATCGTAGGAATTGA<br>Reverse Primer:<br>CCTGCCACTGTCCAGTTCTCA<br>Probe-FAM:<br>TGTCCTGCTTGTGG               |
| CDK1        | custom        | NM_001786.4    | 2 - 3         | 164-239        | 76              | Forward Primer:<br>GAGAAAATTGGAGAAGGTACCTATGG<br>Reverse Primer:<br>TCATGGCTACCACTTGACCTGTA<br>Probe-FAM:<br>TGTATAAGGGTAGACACAAAA |
| EIF4EBP1    | Hs00607050_m1 | NM_004095.3    | 2 - 3         | 395            | 69              | Probe-FAM:<br>ATAAGCGGGCGGGCGGTGAAGAGTC                                                                                            |
| EPB41L5     | Hs01554426_m1 | NM_001184937.1 | 14 - 15       | 1375           | 67              | Probe-FAM:<br>AACTTAGTGTTCAACAATAATGTTTC                                                                                           |
| LY6E        | Hs03045111_g1 | NM_001127213.1 | 3 - 4         | 329            | 66              | Probe-FAM:<br>GCCGGCATTGGGAATCTCGTGACAT                                                                                            |

|         |                |                |         |      |    |                                         |
|---------|----------------|----------------|---------|------|----|-----------------------------------------|
| MIEN1   | Hs00260553_m1  | NM_032339.3    | 2 - 3   | 229  | 83 | Probe-FAM:<br>CGGGGGCACAGGTGCCTTTGAGATA |
| MMP1    | Hs00899658_m1  | NM_001145938.1 | 7 - 8   | 1019 | 64 | Probe-FAM:<br>AAGTCCGGTTTTTCAAAGGGAATAA |
| MRPS23  | Hs00950118_g1  | NM_016070.3    | 4 - 5   | 484  | 79 | Probe-FAM:<br>AAGCAAGGACTCAACACGGAGGTAG |
| NDUFB10 | Hs01018233_g1  | NM_004548.2    | 2 - 3   | 375  | 83 | Probe-FAM:<br>AGTGGAAGAGGGACTACAAAGTCGA |
| PHLDA2  | Hs04194980_s1  | NM_003311.3    | 1 - 1   | 254  | 75 | Probe-FAM:<br>GCGCACGGCAAGTACGTGTACTTC  |
| TOP2A   | Hs01032142_g1  | NM_001067.3    | 26 - 27 | 3611 | 96 | Probe-FAM:<br>TAAGAAATGAAAAAGAACAAGAGCT |
| ALYREF  | Hs01099193_g1_ | NM_005782.3    | 3 - 4   | 543  | 70 | Probe-FAM:<br>CGTCCCTCTGGATGGCCGCCCATG  |
| GAPDH   | Hs_03929097_g1 | NM_001256799.1 | 8 - 8   | 1250 | 58 | Probe-FAM:<br>CAAGAGGAAGAGAGAGACCCTCACT |
| HPRT1   | Hs02800695_m1  | NM_000194.2    | 2 - 3   | 297  | 82 | Probe-FAM:<br>GGACTAATTATGGACAGGACTGAAC |
| GUSB    | Hs99999908_m1  | NM_000181.3    | 11 - 12 | 1925 | 81 | Probe-FAM:<br>TGAACAGTCACCGACGAGAGTGCTG |
| TBP     | Hs00427621_m1  | NM_001172085.1 | 3 - 4   | 666  | 65 | Probe-FAM:<br>AATCCCAAGCGGTTTGCTGCGGTAA |

**Legend to Supplementary Table S4.** Gene name (Gene Symbol) and identification number (Assay ID) of each TaqMan assay, accession number of the transcripts (Ref Seq) recognized by the assay, exon boundary, assay location and amplicon length are indicated. For TaqMan custom assays, locations of 5' nucleotide start and 3' nucleotide end of the entire amplicon and oligonucleotide sequences of forward and reverse primers, as well as FAM-probes are indicated. For proprietary designed TaqMan assays, locations corresponding to the nucleotide base located in the center of the probe and oligonucleotide context sequences of FAM-probes released by the vendor are reported.

**Supplementary Table S5.** Risk prediction algorithm based on mRNA expression levels of the 20 SC genes.

| Gene Symbol          | Value                |
|----------------------|----------------------|
| H2AFZ                | -0.01859310295660840 |
| CDK1                 | -0.06976848796306750 |
| EXOSC4               | -0.00637353864393068 |
| PHLDA2               | -0.05504809927914070 |
| APOBEC3B             | 0.02139449407835210  |
| EIF4EBP1             | -0.06561519832001840 |
| SFN                  | 0.00241415261227383  |
| PHB                  | -0.01856010067320840 |
| EPB41L5              | -0.03434054196123320 |
| RACGAP1              | -0.04784034389453400 |
| MRPS23               | -0.09612536213842390 |
| TOP2A                | -0.06253072902806960 |
| H2AFJ                | -0.00972700284313969 |
| NOL3                 | -0.02212862243820850 |
| MIEN1                | -0.01645816728337240 |
| CENPW                | 0.01038668250241190  |
| LY6E                 | -0.05456883437314120 |
| ALYREF               | -0.02403611555643560 |
| MMP1                 | -0.03688016578089580 |
| NDUFB10              | 0.00295444133576209  |
| <b>Scale factors</b> |                      |
| <b>Maximum</b>       | -14.9663172          |
| <b>Minimum</b>       | -17.5085913          |

**Legend to Supplementary Table S5.** RT-qPCR expression data for the 20 SC genes in the training set (N = 772) of the “IEO BC 97-00” cohort were used to derive a prognostic risk model after adjustment of regression coefficients of the respective genes by ridge penalized Cox regression model using 10-fold cross-validation. The regression coefficients obtained from the training set for each gene are indicated. Scale factors used to scale the risk score in a 0-100 range are also reported.

**Supplementary Table S6.** Distribution of clinicopathological characteristics and behaviour of the 20-signature continuous risk score in the patients of the IEO BC 97-00 cohort that were randomly assigned to the training and validation sets.

| Variable                                      | All<br>N (% col) | Training<br>N (% row) | Validation<br>N (% row) | p value                            |
|-----------------------------------------------|------------------|-----------------------|-------------------------|------------------------------------|
| <b>All</b>                                    | 2316 (100)       | 772 (33·3)            | 1544 (66·7)             |                                    |
| <b>Age at surgery</b>                         |                  |                       |                         | 0·22                               |
| <50                                           | 911 (39·3)       | 290 (31·8)            | 621 (68·2)              |                                    |
| ≥50                                           | 1405 (60·7)      | 482 (34·3)            | 923 (65·7)              |                                    |
| <b>Histology</b>                              |                  |                       |                         | 0·56                               |
| Ductal                                        | 1859 (80·3)      | 625 (33·6)            | 1234 (66·4)             |                                    |
| No Ductal                                     | 457 (19·7)       | 147 (32·2)            | 310 (67·8)              |                                    |
| <b>pT</b>                                     |                  |                       |                         | 0·16                               |
| pT1a/b                                        | 298 (12·9)       | 109 (36·6)            | 189 (63·4)              |                                    |
| pT1c                                          | 1195 (51·6)      | 374 (31·3)            | 821 (68·7)              |                                    |
| pT2                                           | 744 (32·1)       | 259 (34·8)            | 485 (65·2)              |                                    |
| pT3/pT4                                       | 79 (3·4)         | 30 (38·0)             | 49 (62·0)               |                                    |
| <b>pN</b>                                     |                  |                       |                         | 0·57                               |
| pN0                                           | 1124 (48·5)      | 373 (33·2)            | 751 (66·8)              |                                    |
| pN+                                           | 1137 (49·1)      | 377 (33·2)            | 760 (66·8)              |                                    |
| pNX                                           | 55 (2·4)         | 22 (40·0)             | 33 (60·0)               |                                    |
| <b>Grade</b>                                  |                  |                       |                         | 0·71                               |
| 1                                             | 427 (18·4)       | 146 (34·2)            | 281 (65·8)              |                                    |
| 2                                             | 1009 (43·6)      | 324 (32·1)            | 685 (67·9)              |                                    |
| 3                                             | 826 (35·7)       | 282 (34·1)            | 544 (65·9)              |                                    |
| n/a                                           | 54 (2·3)         | 20 (37·0)             | 34 (63·0)               |                                    |
| <b>LVI</b>                                    |                  |                       |                         | 0·95                               |
| Absent                                        | 1567 (67·7)      | 523 (33·4)            | 1044 (66·6)             |                                    |
| Present                                       | 749 (32·3)       | 249 (33·2)            | 500 (66·8)              |                                    |
| <b>ER/PgR</b>                                 |                  |                       |                         | 0·67                               |
| Not expressed (Both 0)                        | 313 (13·5)       | 101 (32·3)            | 212 (67·7)              |                                    |
| Expressed (ER>0 or PgR>0)                     | 2003 (86·5)      | 671 (33·5)            | 1332 (66·5)             |                                    |
| <b>HER2 Status</b>                            |                  |                       |                         | 0·84                               |
| NEG                                           | 1826 (78·8)      | 605 (33·1)            | 1221 (66·9)             |                                    |
| POS                                           | 253 (10·9)       | 84 (33·2)             | 169 (66·8)              |                                    |
| n/a                                           | 237 (10·2)       | 83 (35·0)             | 154 (65·0)              |                                    |
| <b>Ki-67</b>                                  |                  |                       |                         | 0·56                               |
| <14%                                          | 653 (28·2)       | 222 (34·0)            | 431 (66·0)              |                                    |
| ≥14%                                          | 1661 (71·7)      | 550 (33·1)            | 1111 (66·9)             |                                    |
| n/a                                           | 2 (0·1)          | 0 (0·0)               | 2 (100)                 |                                    |
| <b>Subtype</b>                                |                  |                       |                         | 0·95                               |
| Luminal                                       | 1827 (78·9)      | 614 (33·6)            | 1213 (66·4)             |                                    |
| HER2+                                         | 253 (10·9)       | 84 (33·2)             | 169 (66·8)              |                                    |
| Triple-Negative                               | 212 (9·2)        | 69 (32·5)             | 143 (67·5)              |                                    |
| n/a                                           | 24 (1·0)         | 5 (20·8)              | 19 (79·2)               |                                    |
| <b>CT/HT</b>                                  |                  |                       |                         | 0·45                               |
| Nil                                           | 111 (4·8)        | 37 (33·3)             | 74 (66·7)               |                                    |
| HT                                            | 806 (34·8)       | 285 (35·4)            | 521 (64·6)              |                                    |
| CT                                            | 320 (13·8)       | 99 (30·9)             | 221 (69·1)              |                                    |
| HT-CT                                         | 1079 (46·6)      | 351 (32·5)            | 728 (67·5)              |                                    |
| <b>Surgery</b>                                |                  |                       |                         | 0·087                              |
| Quadrantectomy                                | 1870 (80·7)      | 608 (32·5)            | 1262 (67·5)             |                                    |
| Mastectomy                                    | 446 (19·3)       | 164 (36·8)            | 282 (63·2)              |                                    |
| <b>Radiotherapy</b>                           |                  |                       |                         | 0·084                              |
| No                                            | 437 (18·9)       | 161 (36·8)            | 276 (63·2)              |                                    |
| Yes                                           | 1879 (81·1)      | 611 (32·5)            | 1268 (67·5)             |                                    |
|                                               |                  | <b>Mean (sd)</b>      | <b>Mean (sd)</b>        | <b>p value<br/>(<i>t</i>-test)</b> |
| <b>20-signature<br/>continuous risk score</b> |                  | 57·7 (14·5)           | 57·0 (14·5)             | 0·28                               |

**Legend to Supplementary Table S6.** Patients from the “IEO BC 97-00” study cohort for whom risk score data were available (N = 2,316) were randomly assigned to the training (N = 772) or validation (N = 1,544) set. The association between group (training/validation set) and the demographic, clinical, and pathological variables was evaluated with the chi-square test. The association between group (training/validation set) and 20-signature continuous risk score was evaluated with the *t*-test. The number (N) of patients and percentage (%) in each group is indicated. pT, primary tumour size; pN, nodal status; LVI, lymphovascular invasion; ER, oestrogen receptor; PgR, progesterone receptor; Ki-67, proliferation index; CT, adjuvant chemotherapy; HT, adjuvant hormone therapy; Nil, no adjuvant therapy; n/a, not available; SD, standard deviation; POS, positive; NEG, negative.

**Supplementary Table S7.** Correlation between 20-gene SC signature and clinicopathological features in the “IEO BC 97-00” cohort.

| Variables                 | N    | Mean (SD)   | Univariate analysis    |         |
|---------------------------|------|-------------|------------------------|---------|
|                           |      |             | Coef. (95% CI)         | p value |
| <b>All</b>                | 1544 | 57.0 (14.5) |                        |         |
| <b>Age at surgery</b>     |      |             |                        |         |
| <50                       | 621  | 58.3 (14.7) | Ref.                   |         |
| ≥50                       | 923  | 56.2 (14.4) | -2.1 (-3.6 to -0.6)    | 0.005   |
| <b>Histology</b>          |      |             |                        |         |
| Ductal                    | 1234 | 59.2 (14.0) | 10.7 (9.0–12.4)        | <0.0001 |
| No Ductal                 | 310  | 48.5 (13.3) | Ref.                   |         |
| <b>pT</b>                 |      |             |                        |         |
| pT1a/b                    | 189  | 49.7 (13.4) | -14.1 (-16.4 to -11.8) | <0.0001 |
| pT1c                      | 821  | 54.3 (13.6) | -9.5 (-11.0 to -8.0)   | <0.0001 |
| pT2                       | 485  | 63.8 (13.5) | Ref.                   |         |
| pT3/pT4                   | 49   | 63.4 (15.5) | -0.4 (-4.4 to 3.6)     | 0.85    |
| <b>pN</b>                 |      |             |                        |         |
| pN0                       | 751  | 55.0 (15.0) | Ref.                   |         |
| pN+                       | 760  | 59.1 (13.9) | 4.1 (2.6–5.5)          | <0.0001 |
| pNX                       | 33   | 53.9 (11.7) | -1.1 (-6.1 to 3.9)     | 0.67    |
| <b>Grade</b>              |      |             |                        |         |
| 1                         | 281  | 45.9 (11.2) | Ref.                   |         |
| 2                         | 685  | 53.8 (12.5) | 7.9 (6.2–9.6)          | <0.0001 |
| 3                         | 544  | 66.7 (12.7) | 20.8 (19.1–22.6)       | <0.0001 |
| n/a                       | 34   | 58.0 (12.2) | 12.1 (7.7–16.5)        | <0.0001 |
| <b>LVI</b>                |      |             |                        |         |
| Absent                    | 1044 | 55.1 (14.4) | Ref.                   |         |
| Present                   | 500  | 61.1 (14.0) | 6.0 (4.5–7.5)          | <0.0001 |
| <b>ER/PgR</b>             |      |             |                        |         |
| Non expressed (Both 0)    | 212  | 64.7 (14.3) | 8.9 (6.9–11.0)         | <0.0001 |
| Expressed (ER>0 or PgR>0) | 1332 | 55.8 (14.2) | Ref.                   |         |
| <b>HER2 Status</b>        |      |             |                        |         |
| NEG                       | 1221 | 56.1 (13.9) | Ref.                   |         |
| POS                       | 169  | 70.6 (12.0) | 14.5 (12.4–16.7)       | <0.0001 |
| UNKNOWN                   | 154  | 49.7 (13.4) | -6.3 (-8.6 to -4.1)    | <0.0001 |
| <b>Ki-67</b>              |      |             |                        |         |
| <14%                      | 431  | 46.0 (11.6) | Ref.                   |         |
| ≥14%                      | 1111 | 61.3 (13.3) | 15.3 (13.9–16.7)       | <0.0001 |
| n/a                       | 2    | 56.4 (0.7)  | 10.4 (-7.4 to 28.2)    | 0.25    |
| <b>Subtype</b>            |      |             |                        |         |
| n/a                       | 19   | 62.2 (14.0) |                        |         |
| Luminal                   | 1213 | 54.5 (13.6) | Ref.                   |         |
| HER2+                     | 169  | 70.6 (12.0) | 16.1 (13.9–18.3)       | <0.0001 |
| Triple-Negative           | 143  | 61.6 (15.0) | 7.1 (4.8–9.5)          | <0.0001 |

**Legend to Supplementary Table S7.** Correlation between the 20-gene SC signature and clinicopathological features was assessed using the linear regression model in the validation set of the “IEO BC 97-00” cohort (N=1,544). Coefficient (Coef.) of the linear regression model is the average difference in risk score between the comparison group and the reference group (Ref.). For instance, in the correlation of the 20-signature with grade of differentiation (Grade), the difference in the average risk score observed in Grade 3 tumour patients (comparison group) vs. Grade 1 tumour patients (reference group) is 20.8. N, Number of patients; SD, standard deviation; Coef., coefficient of linear regression model; CI, confidence interval; n/a, not available; pT, primary tumour size; pN, nodal status; ER, oestrogen receptor; PgR, progesterone receptor; Ki-67, proliferation index; LVI, lymphovascular invasion; POS, positive; NEG, negative; Ref., reference group.

**Supplementary Table S8.** Summary of the performance of the 20-signature risk model used as a continuous function (10-unit increase) in the prediction of the likelihood of distant metastasis in a stratified analysis of the different molecular subtypes of BC in the “IEO BC 97-00” validation set.

|                         | Subgroups        | N <sup>§</sup> | DM  | Univariate       | p value | Multivariable    | p value |
|-------------------------|------------------|----------------|-----|------------------|---------|------------------|---------|
|                         |                  |                |     | HR (95% CI)      |         | HR* (95% CI)     |         |
| <b>Any time</b>         | All              | 1544           | 231 | 1.47 (1.35;1.61) | <0.0001 | 1.24 (1.11–1.38) | 0.0002  |
|                         | Luminal          | 1213           | 163 | 1.64 (1.47;1.83) | <0.0001 | 1.30 (1.13–1.48) | 0.0002  |
|                         | Triple-Negative  | 143            | 29  | 1.29 (1.00;1.68) | 0.050   | 1.42 (1.05–1.92) | 0.023   |
|                         | HER2+            | 169            | 36  | 1.01 (0.78;1.32) | 0.92    | 1.00 (0.74–1.36) | 0.99    |
| <b>Early metastasis</b> | All              | 1544           | 140 | 1.59 (1.43;1.78) | <0.0001 | 1.25 (1.08–1.44) | 0.002   |
|                         | Luminal          | 1213           | 87  | 1.68 (1.45;1.94) | <0.0001 | 1.30 (1.08–1.56) | 0.004   |
|                         | Triple- Negative | 143            | 24  | 1.50 (1.13;2.01) | 0.006   | 1.38 (0.99–1.90) | 0.054   |
|                         | HER2+            | 169            | 29  | 1.10 (0.82;1.47) | 0.54    | 1.08 (0.77–1.50) | 0.67    |
| <b>Late metastasis</b>  | All              | 1236           | 67  | 1.38 (1.18;1.61) | <0.0001 | 1.27 (1.03–1.57) | 0.027   |
|                         | Luminal          | 998            | 60  | 1.68 (1.41;2.00) | <0.0001 | 1.37 (1.09–1.71) | 0.006   |
|                         | Triple- Negative | 102            | 1   | 0.64 (0.24;1.70) | 0.37    | NE               | NE      |
|                         | HER2+            | 118            | 5   | 0.61 (0.30;1.23) | 0.17    | 0.42 (0.11–1.63) | 0.20    |

**Legend to Supplementary Table S8.** Univariate and multivariable analysis in all patients of the “IEO BC 97-00” validation set and in patients divided by molecular subtype, for the early (<5 years from surgery) and late (5-10 years post-surgery) time intervals, were performed. The hazard ratios were estimated with a Cox proportional hazards univariate model (HR) and multivariable model (HR\*), adjusted for Grade (G1, G2 and G3), Ki-67 (Ki-67<14% and Ki-67≥14%), HER2 status (positive and negative), oestrogen/progesterone receptor status [not expressed (Both 0) and expressed (ER > 0 or PgR > 0)], tumour size (pT1 and pT2-3-4), number of positive lymph nodes (pN0, pN1-2-3 and pNX) and age at surgery (<50 and ≥50). N, number of patients; DM, number of distant metastasis events; HR, hazard ratio; CI, confidence interval; NE, Not estimable. <sup>§</sup>Nineteen patients could not be assigned to the subgroups.

**Supplementary Table S9.** Correlation between clinicopathological parameters and CSC proliferation kinetics (self-limiting vs. unlimited expansion) in a 90-BC patient cohort.

| Variable                    | All<br>N (% col) | Self-limiting<br>expansion<br>N (% row) | Unlimited<br>expansion<br>N (% row) | p value |
|-----------------------------|------------------|-----------------------------------------|-------------------------------------|---------|
| <b>All</b>                  | 90 (100)         | 40 (44.4)                               | 50 (55.6)                           |         |
| <b>Age at surgery</b>       |                  |                                         |                                     | 0.10    |
| <50                         | 62 (68.9)        | 24 (38.7)                               | 38 (61.3)                           |         |
| ≥50                         | 28 (31.1)        | 16 (57.1)                               | 12 (42.9)                           |         |
| <b>Histology</b>            |                  |                                         |                                     | 0.002   |
| Ductal                      | 75 (83.3)        | 28 (37.3)                               | 47 (62.7)                           |         |
| No Ductal                   | 15 (16.7)        | 12 (80.0)                               | 3 (20.0)                            |         |
| <b>pT</b>                   |                  |                                         |                                     | 0.29    |
| pT1a/b                      | 4 (4.4)          | 3 (75.0)                                | 1 (25.0)                            |         |
| pT1c                        | 26 (28.9)        | 13 (50.0)                               | 13 (50.0)                           |         |
| pT2                         | 48 (53.3)        | 21 (43.7)                               | 27 (56.2)                           |         |
| pT3/pT4                     | 12 (13.3)        | 3 (25.0)                                | 9 (75.0)                            |         |
| <b>Positive lymph nodes</b> |                  |                                         |                                     | 0.87    |
| pN0                         | 24 (26.7)        | 11 (45.8)                               | 13 (54.2)                           |         |
| pN+                         | 66 (73.3)        | 29 (43.9)                               | 37 (56.1)                           |         |
| <b>Grade</b>                |                  |                                         |                                     | <0.001  |
| 1                           | 13 (14.4)        | 12 (92.3)                               | 1 (7.7)                             |         |
| 2                           | 40 (44.4)        | 18 (45.0)                               | 22 (55.0)                           |         |
| 3                           | 37 (41.1)        | 10 (27.0)                               | 27 (73.0)                           |         |
| <b>LVI</b>                  |                  |                                         |                                     | 0.015   |
| Absent                      | 39 (43.3)        | 23 (59.0)                               | 16 (41.0)                           |         |
| Present                     | 51 (56.7)        | 17 (33.3)                               | 34 (66.7)                           |         |
| <b>ER/PgR</b>               |                  |                                         |                                     | 0.56    |
| Not expressed (Both 0)      | 11 (12.2)        | 4 (36.4)                                | 7 (63.6)                            |         |
| Expressed (ER>0 or PgR>0)   | 79 (87.8)        | 36 (45.6)                               | 43 (54.4)                           |         |
| <b>HER2 status</b>          |                  |                                         |                                     | 0.25    |
| Negative                    | 82 (91.1)        | 38 (46.3)                               | 44 (53.7)                           |         |
| Positive                    | 8 (8.9)          | 2 (25.0)                                | 6 (75.0)                            |         |
| <b>Ki-67</b>                |                  |                                         |                                     | <0.001  |
| <14%                        | 17 (18.9)        | 14 (82.4)                               | 3 (17.6)                            |         |
| ≥14%                        | 73 (81.1)        | 26 (35.6)                               | 47 (64.4)                           |         |
| <b>Subtype</b>              |                  |                                         |                                     | 0.36    |
| Luminal                     | 73 (81.1)        | 35 (47.9)                               | 38 (52.1)                           |         |
| HER2+                       | 8 (8.9)          | 2 (25.0)                                | 6 (75.0)                            |         |
| Triple-Negative             | 9 (10.0)         | 3 (33.3)                                | 6 (66.7)                            |         |

**Legend to Supplementary Table S9.** The association between the self-limiting or unlimited proliferative phenotype of CSCs and the demographic, clinical and pathological variables, was evaluated using the chi-square test. The number (N) of patients and percentage (%) in each group is indicated. pT, primary tumour size; pN, nodal status; LVI, lymphovascular invasion; Ki-67, proliferation index; p, p-value.

**Supplementary Table S10.** Clinicopathological characteristics of the ER+/HER2- patients of the “IEO BC 97-00” cohort randomly assigned to the training and validation set.

| Variable              | All<br>N (% col) | Training<br>N (% row) | Validation<br>N (% row) | p value |
|-----------------------|------------------|-----------------------|-------------------------|---------|
| <b>All</b>            | 1827 (100)       | 609 (33.3)            | 1218 (66.7)             |         |
| <b>Age at surgery</b> |                  |                       |                         | 0.51    |
| <50                   | 670 (36.7)       | 217 (32.4)            | 453 (67.6)              |         |
| ≥50                   | 1157 (63.3)      | 392 (33.9)            | 765 (66.1)              |         |
| <b>Histology</b>      |                  |                       |                         | 0.91    |
| Ductal                | 1407 (77.0)      | 470 (33.4)            | 937 (66.6)              |         |
| No Ductal             | 420 (23.0)       | 139 (33.1)            | 281 (66.9)              |         |
| <b>pT</b>             |                  |                       |                         | 0.33    |
| pT1a/b                | 266 (14.6)       | 97 (36.5)             | 169 (63.5)              |         |
| pT1c                  | 989 (54.1)       | 312 (31.5)            | 677 (68.5)              |         |
| pT2                   | 517 (28.3)       | 182 (35.2)            | 335 (64.8)              |         |
| pT3/pT4               | 55 (3.0)         | 18 (32.7)             | 37 (67.3)               |         |
| <b>pN</b>             |                  |                       |                         | 0.83    |
| pN0                   | 910 (49.8)       | 303 (33.3)            | 607 (66.7)              |         |
| pN+                   | 866 (47.4)       | 287 (33.1)            | 579 (66.9)              |         |
| pNX                   | 51 (2.8)         | 19 (37.3)             | 32 (62.7)               |         |
| <b>Grade</b>          |                  |                       |                         | 0.57    |
| 1                     | 418 (22.9)       | 140 (33.5)            | 278 (66.5)              |         |
| 2                     | 910 (49.8)       | 291 (32.0)            | 619 (68)                |         |
| 3                     | 453 (24.8)       | 161 (35.5)            | 292 (64.5)              |         |
| n/a                   | 46 (2.5)         | 17 (37.0)             | 29 (63.0)               |         |
| <b>LVI</b>            |                  |                       |                         | 0.88    |
| Absent                | 1276 (69.8)      | 424 (33.2)            | 852 (66.8)              |         |
| Present               | 551 (30.2)       | 185 (33.6)            | 366 (66.4)              |         |
| <b>Ki-67</b>          |                  |                       |                         | 0.72    |
| <14%                  | 627 (34.3)       | 213 (34.0)            | 414 (66.0)              |         |
| ≥14%                  | 1199 (65.6)      | 396 (33.0)            | 803 (67.0)              |         |
| n/a                   | 1 (0.1)          | 0 (0.0)               | 1 (100.0)               |         |
| <b>CT/HT</b>          |                  |                       |                         | 0.64    |
| Nil                   | 81 (4.4)         | 26 (32.1)             | 55 (67.9)               |         |
| HT                    | 786 (43.0)       | 272 (34.6)            | 514 (65.4)              |         |
| CT                    | 55 (3.0)         | 15 (27.3)             | 40 (72.7)               |         |
| HT-CT                 | 905 (49.5)       | 296 (32.7)            | 609 (67.3)              |         |
| <b>Surgery</b>        |                  |                       |                         | 0.29    |
| Quadrantectomy        | 1524 (83.4)      | 500 (32.8)            | 1024 (67.2)             |         |
| Mastectomy            | 303 (16.6)       | 109 (36.0)            | 194 (64.0)              |         |
| <b>Radiotherapy</b>   |                  |                       |                         | 0.27    |
| No                    | 314 (17.2)       | 113 (36.0)            | 201 (64.0)              |         |
| Yes                   | 1513 (82.8)      | 496 (32.8)            | 1017 (67.2)             |         |

**Legend to Supplementary Table S10.** Comparison of the clinicopathological characteristics of ER+/HER2- patients of the “IEO BC 97-00” cohort that were randomly assigned to the training and validation sets. Risk score data were available for 1827 ER+/HER2- patients. The association between group (training or validation set) and the demographic, clinical, and pathological variables was evaluated using the chi-square test. The number (N) of patients and percentage (%) in each group is indicated. pT, primary tumour size; pN, nodal status; LVI, lymphovascular invasion; ER, oestrogen receptor; PgR, progesterone receptor; Ki-67, proliferation index; CT, adjuvant chemotherapy; HT, adjuvant hormone therapy; Nil, no adjuvant therapy; n/a, not available.



**Supplementary Table S11.** Development of the StemPrintER risk model.

| <b>Gene Symbol</b>     | <b>Value</b>         |
|------------------------|----------------------|
| H2AFZ                  | -0.03833591325196550 |
| CDK1                   | -0.06132455806571770 |
| EXOSC4                 | -0.02105976326055420 |
| PHLDA2                 | -0.06295739658169650 |
| APOBEC3B               | 0.02341881674020150  |
| EIF4EBP1               | -0.13911217901125500 |
| SFN                    | 0.05788269046891110  |
| PHB                    | -0.03538557745953510 |
| EPB41L5                | -0.04675539403890050 |
| RACGAP1                | -0.05097505893853430 |
| MRPS23                 | -0.14201022110072700 |
| TOP2A                  | -0.11290078348786600 |
| H2AFJ                  | -0.04975471358452700 |
| NOL3                   | -0.04193802459521500 |
| MIEN1                  | 0.01133668644106850  |
| CENPW                  | -0.03717918353187610 |
| LY6E                   | -0.02829256296234230 |
| ALYREF                 | -0.09541915699494330 |
| MMP1                   | -0.00911370427072023 |
| NDUFB10                | 0.00626166874136819  |
| <b>2-class cut-off</b> |                      |
| Median                 | 56.31840823          |
| <b>Scale factors</b>   |                      |
| Maximum                | -21.7767727          |
| Minimum                | -25.2349961          |

**Legend to Supplementary Table S11.** RT-qPCR expression data for the 20 SC genes in the ER+/HER2- BC subgroup were used to derive a prognostic risk model after adjustment of regression coefficients of the respective genes by the ridge penalized Cox regression model using a 10-fold cross-validation. The regression coefficients obtained from the training set for each gene are indicated. Scale factors used to scale the risk score in a 0 – 100 range and cut-offs used to categorize patients into 2 classes (low, high) of risk are also reported.

**Supplementary Table S12.** Stratification of the training and validation set of ER+/HER2- patients according to StemPrintER used as a continuous risk score or as a 2-class risk model.

| Patient group                               | All<br>N (% col) | Training<br>N (% row) | Validation<br>N (% row) | p value                   |
|---------------------------------------------|------------------|-----------------------|-------------------------|---------------------------|
| All                                         | 1827 (100)       | 609 (33.3)            | 1218 (66.7)             |                           |
| <b>StemPrintER<br/>2-class model</b>        |                  |                       |                         | 0.26                      |
| Low                                         | 949 (51.9)       | 305 (32.1)            | 644 (67.9)              |                           |
| High                                        | 878 (48.1)       | 304 (34.6)            | 574 (65.4)              |                           |
| Variable                                    |                  | Mean (SD)             | Mean (SD)               | p value ( <i>t-test</i> ) |
| <b>StemPrintER<br/>continuous ris score</b> |                  | 57.2 (14.5)           | 56.5 (14.5)             | 0.36                      |

**Legend to Supplementary Table S12.** Risk score data were available for 1,827 ER+/HER2- patients from the “IEO BC 97-00” cohort. StemPrintER was used as a 2-class risk model or as a continuous function. The association between group (training/validation set) and StemPrintER 2-class categorization was evaluated with the chi-square test. For the analysis of StemPrintER used as a continuous function, the difference in the mean risk score between the training and validation set was evaluated with the *t*-test. The number (N) of patients and percentage (%) in each group is indicated. SD, standard deviation; Int., intermediate.

**Supplementary Table S13.** Correlation between the StemPrintER continuous risk score and clinicopathological parameters in a univariate analysis of the ER+/HER2- validation set.

| Variable              | N    | Mean (SD)   | Univariate analysis    |         |
|-----------------------|------|-------------|------------------------|---------|
|                       |      |             | Coef. (95% CI)         | p value |
| <b>All</b>            | 1218 | 56.5 (14.5) |                        |         |
| <b>Age at surgery</b> |      |             |                        |         |
| <50                   | 453  | 57.0 (14.9) | Ref.                   |         |
| ≥50                   | 765  | 56.2 (14.2) | -0.8 (-2.5 to 0.9)     | 0.36    |
| <b>Histology</b>      |      |             |                        |         |
| Ductal                | 937  | 58.4 (14.4) | 8.0 (6.1–9.9)          | <0.0001 |
| No Ductal             | 281  | 50.4 (13.1) | Ref.                   |         |
| <b>pT</b>             |      |             |                        |         |
| pT1a/b                | 169  | 50.4 (12.9) | -14.2 (-16.7 to -11.7) | <0.0001 |
| pT1c                  | 677  | 53.8 (13.3) | -10.7 (-12.5 to -8.9)  | <0.0001 |
| pT2                   | 335  | 64.5 (14.3) | Ref.                   |         |
| pT3/pT4               | 37   | 61.7 (13.4) | -2.9 (-7.4 to 1.7)     | 0.22    |
| <b>pN</b>             |      |             |                        |         |
| pN0                   | 607  | 54.3 (14.5) | Ref.                   |         |
| pN+                   | 579  | 59.0 (14.2) | 4.7 (3.1–6.3)          | <0.0001 |
| pNX                   | 32   | 54.3 (12.9) | 0.0 (-5.1 to 5.1)      | 0.99    |
| <b>Grade</b>          |      |             |                        |         |
| 1                     | 278  | 47.4 (11.0) | Ref.                   |         |
| 2                     | 619  | 55.0 (12.4) | 7.7 (5.9–9.4)          | <0.0001 |
| 3                     | 292  | 68.1 (14.2) | 20.7 (18.6–22.8)       | <0.0001 |
| n/a                   | 29   | 59.2 (13.1) | 11.8 (7.0–16.6)        | <0.0001 |
| <b>LVI</b>            |      |             |                        |         |
| Absent                | 852  | 54.6 (14.2) | Ref.                   |         |
| Present               | 366  | 60.9 (14.2) | 6.3 (4.5–8.0)          | <0.0001 |
| <b>Ki-67</b>          |      |             |                        |         |
| <14%                  | 414  | 47.7 (11.3) | Ref.                   |         |
| ≥14%                  | 803  | 61.1 (13.9) | 13.4 (11.9–15.0)       | <0.0001 |
| n/a                   | 1    | 54.5 (n/a)  | 6.8 (-18.7 to 32.4)    | 0.60    |

**Legend to Supplementary Table S13.** Correlation between the StemPrintER continuous risk score and clinicopathological features was assessed using the univariate linear regression model in the ER+/HER2- validation set (N = 1,218). Coefficient (Coef.) of the linear regression model is the average difference in risk score between comparison group and the reference group (Ref.). For instance, in the correlation of StemPrintER risk score and grade of differentiation (Grade), the difference in the average risk score observed in Grade 3 tumour patients (comparison group) vs. Grade 1 tumour patients (reference group) is 20.7. N, Number of patients; SD, Standard deviation; Coef., coefficient of linear regression model; CI, confidence interval; n/a, not available; pT, primary tumour size; pN, nodal status; Ki-67, proliferation index; LVI, lymphovascular invasion; Ref., reference group.

**Supplementary Table S14.** Summary of the performance of the StemPrintER risk model, used as a continuous (10-unit increase) function or according to a 2-class categorization, in predicting risk of recurrence in the ER+/HER2- training and validation sets.

| Training Set   | Risk Model            | Univariate<br>N=609  |         | Multivariable<br>N=609  |         |
|----------------|-----------------------|----------------------|---------|-------------------------|---------|
|                |                       | HR (95% CI)          | p value | HR* (95% CI)            | p value |
| Training Set   | Continuous risk score | 1.59 (1.38–1.83)     | <0.0001 | 1.35 (1.11–1.63)        | 0.002   |
|                | 2-Class: High vs Low  | 4.25 (2.56–7.06)     | <0.0001 | 2.38 (1.30–4.35)        | 0.005   |
| Validation Set | Risk Model            | Univariate<br>N=1218 |         | Multivariable<br>N=1218 |         |
|                |                       | HR (95% CI)          | p value | HR* (95% CI)            | p value |
| Validation Set | Continuous risk score | 1.55 (1.41–1.71)     | <0.0001 | 1.23 (1.09–1.40)        | 0.0009  |
|                | 2-Class: High vs Low  | 3.37 (2.40–4.74)     | <0.0001 | 1.85 (1.25–2.74)        | 0.002   |

**Legend to Supplementary Table S14.** StemPrintER was used as a continuous function or as a 2-class risk model to predict risk of distant metastasis in the ER+/HER2- BC training and validation sets. Table reports univariate and multivariable analyses for the entire follow-up interval. The hazard ratios were estimated with a Cox proportional hazards univariate (HR) and multivariable (HR\*) model, adjusted for Grade (G1, G2 and G3), Ki-67 (Ki-67 < 14% and Ki-67 ≥ 14%), tumour size (pT1 and pT2-3-4), number of positive lymph nodes (pN0, pN1-2-3 and pNX) and age at surgery (<50 and ≥50). N, number of patients; HR, hazard ratio; CI, confidence interval; Int., Intermediate risk category.

**Supplementary Table S15.** Multivariable Cox proportional analysis of risk of early (0-5 years) or late (5-10 years) distant metastasis in the ER+/HER2- validation set according to the StemPrintER continuous risk model.

| Variable                        | Early distant metastasis recurrence<br>(0-5 years) |            |         | Late distant metastasis recurrence<br>(5-10 years) |           |         |
|---------------------------------|----------------------------------------------------|------------|---------|----------------------------------------------------|-----------|---------|
|                                 | HR                                                 | 95% CI     | p value | HR                                                 | 95% CI    | p value |
| StemPrintER<br>10-unit increase | 1.23                                               | 1.04-1.46  | 0.016   | 1.32                                               | 1.07-1.62 | 0.008   |
| Age $\geq 50$ vs $< 50$         | 1.42                                               | 0.91-2.24  | 0.13    | 0.96                                               | 0.57-1.60 | 0.86    |
| pT2-3-4 vs pT1                  | 2.88                                               | 1.77-4.68  | <.0001  | 1.84                                               | 1.06-3.21 | 0.032   |
| pN+ vs pN0                      | 1.91                                               | 1.17-3.13  | 0.010   | 4.13                                               | 2.11-8.08 | <.0001  |
| pNX vs pN0                      | 1.81                                               | 0.42-7.74  | 0.42    | NE                                                 | NE        | NE      |
| Gn/a vs G1                      | 1.05                                               | 0.12-9.15  | 0.97    | 1.41                                               | 0.28-7.14 | 0.68    |
| G2 vs G1                        | 2.43                                               | 0.92-6.46  | 0.074   | 0.92                                               | 0.38-2.24 | 0.85    |
| G3 vs G1                        | 4.47                                               | 1.55-12.90 | 0.005   | 1.00                                               | 0.37-2.77 | 0.99    |
| Ki-67 $\geq 14\%$ vs $< 14\%$   | 0.80                                               | 0.43-1.49  | 0.47    | 1.95                                               | 0.86-4.42 | 0.108   |

**Legend to Supplementary Table S15.** StemPrintER was used as a continuous risk model to estimate the likelihood of developing distant metastasis in the early (0-5 years) and late (5-10 years) time interval after surgery in the validation cohort of 1,218 ER+/HER- patients. Hazard ratios for distant metastasis were estimated with a Cox proportional hazards multivariable model adjusted for Grade (G1, G2 and G3), Ki-67 (Ki-67 $< 14\%$  and Ki-67 $\geq 14\%$ ), tumour size (pT1 and pT2-3-4), number of positive lymph nodes (pN0, pN1-2-3 and pNX) and age at surgery ( $< 50$  and  $\geq 50$ ). HR, hazard ratio; CI, confidence interval; NE, not estimable; n/a, not available.

**Supplementary Table S16.** Summary of the predictive power of the StemPrintER risk model used as a continuous (10-unit increase) function to estimate risk of recurrence in all patients and in different subgroups of ER+/HER2- patients of the validation set.

| Time                         | Subgroup       | Univariate analysis |         | Multivariable analysis |         |
|------------------------------|----------------|---------------------|---------|------------------------|---------|
|                              |                | HR (95% CI)         | p value | HR* (95% CI)           | p value |
| Early metastasis (0-5 years) | All            | 1.60 (1.40-1.82)    | <0.0001 | 1.23 (1.04-1.46)       | 0.0158  |
|                              | Premenopausal  | 1.58 (1.29-1.93)    | <0.0001 | 1.32 (1.01-1.71)       | 0.0387  |
|                              | Postmenopausal | 1.64 (1.37-1.97)    | <0.0001 | 1.21 (0.96-1.52)       | 0.11    |
|                              | Ductal         | 1.56 (1.35-1.80)    | <0.0001 | 1.20 (1.00-1.45)       | 0.0464  |
|                              | No Ductal      | 1.64 (1.10-2.44)    | 0.0141  | 1.32 (0.80-2.19)       | 0.28    |
|                              | pT1            | 1.52 (1.18-1.96)    | 0.0014  | 1.40 (1.02-1.92)       | 0.0363  |
|                              | pT2/3/4        | 1.33 (1.12-1.58)    | 0.001   | 1.17 (0.96-1.44)       | 0.13    |
|                              | pN0            | 2.02 (1.55-2.63)    | <0.0001 | 1.71 (1.22-2.39)       | 0.002   |
|                              | pN+            | 1.40 (1.19-1.64)    | <0.0001 | 1.12 (0.91-1.37)       | 0.29    |
|                              | G1             | 1.30 (0.62-2.72)    | 0.49    | 0.86 (0.34-2.15)       | 0.75    |
|                              | G2             | 1.48 (1.14-1.91)    | 0.0027  | 1.43 (1.06-1.91)       | 0.0181  |
|                              | G3             | 1.34 (1.09-1.64)    | 0.0052  | 1.19 (0.96-1.49)       | 0.11    |
|                              | LVI Absent     | 1.53 (1.28-1.83)    | <0.0001 | 1.21 (0.97-1.51)       | 0.0991  |
|                              | LVI Present    | 1.60 (1.30-1.97)    | <0.0001 | 1.26 (0.96-1.65)       | 0.0977  |
|                              | Ki-67<14%      | 1.80 (1.28-2.53)    | 0.0008  | 1.48 (0.95-2.31)       | 0.0839  |
|                              | Ki-67≥14%      | 1.53 (1.30-1.79)    | <0.0001 | 1.20 (1.00-1.44)       | 0.0562  |
| Late metastasis (5-10 years) | All            | 1.60 (1.37-1.88)    | <0.0001 | 1.32 (1.07-1.62)       | 0.0084  |
|                              | Premenopausal  | 1.72 (1.40-2.10)    | <0.0001 | 1.48 (1.13-1.95)       | 0.0045  |
|                              | Postmenopausal | 1.44 (1.12-1.85)    | 0.0046  | 1.15 (0.83-1.59)       | 0.41    |
|                              | Ductal         | 1.59 (1.33-1.89)    | <0.0001 | 1.38 (1.10-1.73)       | 0.0052  |
|                              | No Ductal      | 1.67 (1.10-2.54)    | 0.016   | 1.02 (0.58-1.78)       | 0.95    |
|                              | pT1            | 1.77 (1.36-2.32)    | <0.0001 | 1.81 (1.30-2.53)       | 0.0004  |
|                              | pT2/3/4        | 1.26 (1.01-1.57)    | 0.041   | 1.04 (0.78-1.38)       | 0.79    |
|                              | pN0            | 1.64 (1.12-2.41)    | 0.0115  | 1.49 (0.92-2.40)       | 0.1     |
|                              | pN+            | 1.48 (1.24-1.77)    | <0.0001 | 1.30 (1.03-1.65)       | 0.025   |
|                              | G1             | 1.10 (0.57-2.11)    | 0.78    | 0.79 (0.37-1.70)       | 0.55    |
|                              | G2             | 1.65 (1.23-2.20)    | 0.0008  | 1.60 (1.13-2.26)       | 0.0086  |
|                              | G3             | 1.43 (1.09-1.87)    | 0.0101  | 1.26 (0.95-1.68)       | 0.11    |
|                              | LVI Absent     | 1.56 (1.27-1.93)    | <0.0001 | 1.29 (1.00-1.66)       | 0.0532  |
|                              | LVI Present    | 1.60 (1.23-2.08)    | 0.0004  | 1.29 (0.90-1.87)       | 0.17    |
|                              | Ki-67<14%      | 1.09 (0.61-1.97)    | 0.77    | 0.98 (0.52-1.85)       | 0.96    |
|                              | Ki-67≥14%      | 1.58 (1.31-1.90)    | <0.0001 | 1.37 (1.10-1.70)       | 0.0046  |

**Legend to Supplementary Table S16.** The StemPrintER risk model was used as a continuous variable (10-unit increase) in a univariate and multivariable analysis to predict risk of early (0-5 years) and late (5-10 years) metastasis in the validation cohort of ER+/HER2- patients stratified by clinicopathological characteristics. Hazard ratios were estimated at each 10-unit increase with a Cox proportional hazards univariate (HR) and multivariable model (HR\*), adjusted for Grade (G1, G2 and G3), Ki-67 (Ki-67<14% and Ki-67≥14%), tumour size (pT1 and pT2-3-4), number of positive lymph nodes (pN0, pN1-2-3 and pNX), and age at surgery (<50 and ≥50), as appropriate in each subgroup analysis. LVI, lymphovascular invasion. N, number of patients; HR, hazard ratio; CI, confidence interval.

**Supplementary Table S17.** Summary of the predictive power of the 2-class StemPrintER risk model in all patients and in different subgroups of ER+/HER2- patients of the validation set.

| Time                         | Subgroup       | Univariate analysis |         | Multivariable analysis |         |
|------------------------------|----------------|---------------------|---------|------------------------|---------|
|                              |                | HR (95% CI)         | p value | HR* (95% CI)           | p value |
| Early metastasis (0-5 years) | All            | 4.68 (2.79–7.87)    | <0.0001 | 2.48 (1.38–4.45)       | 0.0024  |
|                              | Premenopausal  | 5.24 (2.14–12.81)   | 0.0003  | 3.12 (1.12–8.70)       | 0.0292  |
|                              | Postmenopausal | 4.33 (2.29–8.19)    | <0.0001 | 2.19 (1.07–4.47)       | 0.0315  |
|                              | Ductal         | 4.67 (2.57–8.49)    | <0.0001 | 2.42 (1.24–4.73)       | 0.0094  |
|                              | No Ductal      | 3.69 (1.17–11.62)   | 0.0258  | 2.46 (0.64–9.51)       | 0.19    |
|                              | pT1            | 2.84 (1.34–6.00)    | 0.0065  | 2.34 (0.99–5.54)       | 0.0532  |
|                              | pT2/3/4        | 3.70 (1.68–8.16)    | 0.0012  | 2.86 (1.23–6.66)       | 0.0148  |
|                              | pN0            | 7.3 (2.48–21.47)    | 0.0003  | 4.09 (1.19–14.02)      | 0.025   |
|                              | pN+            | 3.57 (1.94–6.59)    | <0.0001 | 2.17 (1.10–4.27)       | 0.0247  |
|                              | G1             | 2.49 (0.42–14.9)    | 0.32    | 1.13 (0.15–8.73)       | 0.91    |
|                              | G2             | 2.78 (1.39–5.57)    | 0.0038  | 2.32 (1.10–4.91)       | 0.027   |
|                              | G3             | 6.22 (1.51–25.67)   | 0.0115  | 4.39 (1.05–18.37)      | 0.0429  |
|                              | LVI Absent     | 4.19 (2.17–8.10)    | <0.0001 | 2.61 (1.24–5.49)       | 0.0115  |
|                              | LVI Present    | 4.49 (1.89–10.69)   | 0.0007  | 2.24 (0.86–5.84)       | 0.1     |
|                              | Ki-67<14%      | 3.15 (1.20–8.28)    | 0.0199  | 1.59 (0.50–5.07)       | 0.43    |
|                              | Ki-67≥14%      | 5.22 (2.50–10.90)   | <0.0001 | 3.05 (1.43–6.53)       | 0.004   |
| Late metastasis (5-10 years) | All            | 3.35 (1.93–5.82)    | <0.0001 | 1.90 (1.01–3.56)       | 0.047   |
|                              | Premenopausal  | 3.51 (1.61–7.65)    | 0.0016  | 1.83 (0.72–4.64)       | 0.2     |
|                              | Postmenopausal | 3.21 (1.47–7.00)    | 0.0035  | 1.89 (0.79–4.50)       | 0.15    |
|                              | Ductal         | 2.89 (1.56–5.38)    | 0.0008  | 1.9 (0.93–3.89)        | 0.0805  |
|                              | No Ductal      | 5.17 (1.51–17.65)   | 0.0088  | 1.73 (0.43–6.88)       | 0.44    |
|                              | pT1            | 3.30 (1.51–7.20)    | 0.0028  | 2.84 (1.20–6.71)       | 0.0176  |
|                              | pT2/3/4        | 1.88 (0.85–4.18)    | 0.12    | 1.17 (0.47–2.94)       | 0.73    |
|                              | pN0            | 2.05 (0.62–6.71)    | 0.24    | 1.14 (0.30–4.29)       | 0.85    |
|                              | pN+            | 3.16 (1.67–5.96)    | 0.0004  | 2.16 (1.04–4.45)       | 0.0378  |
|                              | G1             | 0.67 (0.08–5.57)    | 0.71    | 0.39 (0.04–3.52)       | 0.4     |
|                              | G2             | 3.16 (1.42–7.04)    | 0.0048  | 2.45 (1.05–5.73)       | 0.0387  |
|                              | G3             | 2.31 (0.69–7.73)    | 0.18    | 2.12 (0.48–9.46)       | 0.32    |
|                              | LVI Absent     | 2.82 (1.38–5.77)    | 0.0045  | 1.73 (0.77–3.86)       | 0.18    |
|                              | LVI Present    | 3.45 (1.40–8.51)    | 0.0072  | 1.93 (0.66–5.64)       | 0.23    |
|                              | Ki-67<14%      | 1.42 (0.29–6.83)    | 0.66    | 1.18 (0.23–6.18)       | 0.84    |
|                              | Ki-67≥14%      | 3.17 (1.59–6.34)    | 0.0011  | 2.19 (1.05–4.55)       | 0.0355  |

**Legend to Supplementary Table S17.** StemPrintER was used as a 2-class risk model in a univariate and multivariable analysis of risk of distant metastasis in the early (0-5 years) and late (5-10 years) time intervals. The hazard ratios (High vs. Low) were estimated with a Cox proportional hazards univariate (HR) and multivariable model (HR\*), adjusted for Grade (G1, G2 and G3), Ki-67 (Ki-67<14% and Ki-67≥14%), tumour size (pT1 and pT2-3-4), number of positive lymph nodes (pN0, pN1-2-3 and pNX), and age at surgery (<50 and ≥50), as appropriate in each subgroup analysis. LVI, lymphovascular invasion. N, number of patients; HR, hazard ratio; CI, confidence interval.

**Supplementary Table S18.** Cumulative incidence of early and late distant metastasis events in all patients and in different ER+/HER2- patient subgroups of the training and validation set estimated using the 2-class StemPrintER risk model.

| Subgroup              |                | Risk Class     | <5-year CI-DM<br>(95% CI) | 5-10 year CI-DM<br>(95% CI) |
|-----------------------|----------------|----------------|---------------------------|-----------------------------|
| <b>Training Set</b>   | All            | High           | 13.7 (10.1–17.9)          | 9.7 (6.3–14)                |
|                       |                | Low            | 2.0 (0.8–4.1)             | 2.6 (1.2–5.1)               |
| <b>Validation Set</b> | All            | High           | 12.3 (9.7–15.2)           | 10.1 (7.4–13.3)             |
|                       |                | Low            | 2.8 (1.7–4.4)             | 3.2 (2.0–5.0)               |
|                       | Premenopausal  | High           | 10.4 (6.9–14.7)           | 11.5 (7.4–16.7)             |
|                       |                | Low            | 2.1 (0.9–4.4)             | 3.5 (1.7–6.3)               |
|                       | Postmenopausal | High           | 13.7 (10.2–17.6)          | 9.0 (5.8–13.1)              |
|                       |                | Low            | 3.4 (1.9–5.7)             | 3.0 (1.5–5.4)               |
|                       | Ductal         | High           | 12.9 (10.1–16)            | 10 (7.1–13.4)               |
|                       |                | Low            | 3.0 (1.7–4.9)             | 3.7 (2.1–5.9)               |
|                       | No Ductal      | High           | 8.9 (3.9–16.4)            | 10.9 (4.8–20)               |
|                       |                | Low            | 2.5 (0.9–5.4)             | 2.3 (0.7–5.4)               |
|                       | pT1            | High           | 5.8 (3.6–8.8)             | 6.7 (4.1–10.3)              |
|                       |                | Low            | 2.1 (1.1–3.6)             | 2.2 (1.1–3.8)               |
|                       | pT2/3/4        | High           | 20.2 (15.5–25.4)          | 15.3 (10.3–21.2)            |
|                       |                | Low            | 6.2 (2.7–11.8)            | 8.5 (4.0–15.3)              |
|                       | pN0            | High           | 7.8 (4.9–11.7)            | 3.1 (1.3–6.2)               |
|                       |                | Low            | 1.1 (0.4–2.7)             | 1.5 (0.6–3.4)               |
|                       | pN+            | High           | 16.1 (12.2–20.4)          | 16.9 (12.2–22.2)            |
|                       |                | Low            | 5.0 (2.8–8.1)             | 5.8 (3.3–9.4)               |
|                       | G1             | High           | 3.5 (0.6–10.8)            | 2.0 (0.2–9.5)               |
|                       |                | Low            | 1.4 (0.4–3.7)             | 3.1 (1.3–6.2)               |
|                       | G2             | High           | 9.1 (6–12.9)              | 8.8 (5.4–13.3)              |
|                       |                | Low            | 3.5 (1.9–5.8)             | 3 (1.5–5.5)                 |
|                       | G3             | High           | 19.2 (14.3–24.6)          | 14.1 (9.1–20.2)             |
|                       |                | Low            | 3.5 (0.6–10.8)            | 6.0 (1.5–15.1)              |
|                       | LVI Absent     | High           | 9.8 (7.0–13.2)            | 7.5 (4.7–11)                |
|                       |                | Low            | 2.5 (1.3–4.1)             | 2.8 (1.5–4.6)               |
|                       | LVI Present    | High           | 16.3 (11.7–21.6)          | 14.9 (9.7–21.2)             |
|                       |                | Low            | 4.1 (1.7–8.3)             | 4.9 (2.0–9.7)               |
| Ki-67<14%             | High           | 9.0 (4.0–16.7) | 3.2 (0.6–10)              |                             |
|                       | Low            | 3.0 (1.5–5.2)  | 2.4 (1.1–4.6)             |                             |
| Ki-67≥14%             | High           | 12.8 (10–16)   | 11.3 (8.3–14.9)           |                             |
|                       | Low            | 2.7 (1.3–5.0)  | 3.8 (2.0–6.7)             |                             |

**Legend to Supplementary Table S18.** The cumulative incidence of distant metastasis (CI-DM) was estimated in the early (0-5 years) and late (5-10 years) time interval post-surgery in all patients and in different patient subgroups of the ER+/HER2- training and validation sets using the StemPrintER 2-class risk model. pT, primary tumour size; pN, nodal status; LVI, lymphovascular invasion; CI, confidence interval.
